# Supplementary material for: Development of molecular markers for invasive alien plants in Korea: a case study of a toxic weed, Cenchrus longispinus L., based on next generation sequencing data
Source: PeerJ. 2019 Nov 11;7:e7965. doi: 10.7717/peerj.7965 (PMC6855208; doi:10.7717/peerj.7965)
Supplement: Supplemental Information 5 [file peerj-07-7965-s005.xlsx]

## Sheet: Supplementary Table 1
Supplementary Table 1. The list of species for phylogenomic analysis
Species	Accession number	Classification
		Subtribe	Tribe	Subfamily
Amphicarpum muhlenbergianum	KU291489	Boivinellinae	Paniceae	Panicoideae
Echinochloa oryzicola	NC_024643	Boivinellinae
Oplismenus hirtellus	KU291473	Boivinellinae
Dichanthelium acuminatum	KU291496	Dichantheliinae
Eriochloa meyeriana	KU291498	Melinidinae
Megathyrsus maximus	KU291470	Melinidinae
Urochloa reptans	KU291486	Melinidinae
Digitaria exilis	NC_024176	Anthephorinae
Thyridolepis xerophila	KU291485	Neurachninae
Paspalidium geminatum	KU291476	Cenchrinae
Cenchrus americanus	NC_024171	Cenchrinae
Cenchrus ciliaris	MH286942	Cenchrinae
Cenchrus purpureus	MF594682	Cenchrinae
Setaria italica	KJ001642	Cenchrinae
Whiteochloa capillipes	KU291487	Cenchrinae
Panicum capillare	KU291475	Panicinae
Panicum virgatum cultivar Summer	HQ822121	Panicinae
Panicum virgatum cultivar Kanlow	HQ731441	Panicinae
Panicum incomtum	MH394348	Panicinae
Panicum lycopodioides	MF563374	Panicinae
Panicum pygmaeum	MF563373	Panicinae
Panicum sumantrense	KX756177	Panicinae
Panicum miliaceum	CM009689	Panicinae
Paspalum ionanthum	MG524002	Paspalinae	Paspaleae
Paspalum inaequivalve	MG524001	Paspalinae
Paspalum virgatum	MG523999	Paspalinae
Paspalum simplex	MG522997	Paspalinae
Paspalum pubiflorum	MG523996	Paspalinae
Paspalum minus	MG523995	Paspalinae
Paspalum paniculatum	MF563367	Paspalinae
Paspalum glaziovii	KU291479	Paspalinae
Paspalum dilatatum	KU291477	Paspalinae
Paspalum fimbriatum	KU291478	Paspalinae
Paspalum juergensii	MG523994	Paspalinae
Paspalum vaginatum	MG523998	Paspalinae
Lecomtella madagascariensis	HF543599	Paspalinae

## Sheet: Supplementary Table 2
Supplementary Table 2: List of primer pairs for molecular marker development
Primer's name	Sequence
Cen_ndhD_F	5'-GTC TGT ATT CAG CTA CCA AGT TT-3'
Cen_ndhD_R	5'-AAT AGC TCC ATT TAG TCC AAT GT-3'
Cen_ndhD_F1	5'-ATT GCC AAT TAT ACC TCT ACA TCC A-3'
Cen_atpB_F	5'-GTG ACT TGT GAG GTA CAA CAA TT-3'
Cen_atpB_R	5'-GGC TGT TAA ACC AAC TCT CAT AC-3'
Cen_atpB_F1	5'-CTG CCT TTA TCG AGT TAG ATC CA-3'
Cen_matK_840F	5'-TGT TCG ATA TCA AGG AAA GGC AG-3'
Cen_matK_1519R	5'-GAT TCA CCA GGT CAT TGA TAC GG-3'
Cen_matK_F1	5'-TAT CAT AGT GGA TCT TCG AAA AGA A-3'

## Sheet: Supplementary Table 3
Supplementary Table 3. The composition of PCR mixture and the PCR protocol for testing molecular markers.
Components	Concentration	Volume (Total 25µl)
Template DNA	50-100mg	1µl
Primers
Cen_atpB_F/ Cen_matK_840F/ Cen_ndhD_F	10pM	0.4µl
Cen_atpB_F1/ Cen_matK_F1/ Cen_ndhD_F1	10pM	0.4µl
Cen_atpB_R/ Cen_matK_1519R/ Cen_ndhD_R	10pM	0.8µl
10X Reaction Buffer (Mg free)		2.5µl
25mM MgCl2	25mM	2µl
10mM dNTP mix	10mM	0.5µl
Etaq Polymerase	0.5 unit/reaction	0.1µl
H2O		17.3µl
Procedure	Tempature	Time
Initialization	940C	2 min
Denaturation	940C	25 sec	30 Cycles
Annealing	570C	40 sec
Extension	720C	30 sec
Final extrantion	720C	7 min
Final hold	40C	∞

## Sheet: Supplementary Table 4
Supplementary Table 4: The list of samples for molecular development
Species	Code	Voucher	Location
Cenchrus longispinus	1	TEX00314476	Lubbock County, Texas, USA
	2	TEX00314466	Presidio County, Texas, USA
	3	George 18-191-1	Winona County, USA
	4	George 18-191-3	Winona County, USA
	5	KHB1218771	Daecheong island, Incheon, Republic of Korea
	6	KHB1218769	Daecheong island, Incheon, Republic of Korea
	7	GCU181605999	Daecheong island, Incheon, Republic of Korea
	8	GCU181606003	Daecheong island, Incheon, Republic of Korea
	9	GCU181606007	Daecheong island, Incheon, Republic of Korea
	10	GCU181606012	Daecheong island, Incheon, Republic of Korea
Cenchrus echinatus	11	AQ831197	Port Curtis, Queensland, Australia
	12	AQ980176	Flinders island, Queensland, Australia
	13	NCU00166064	Mcintosh County, Georgia, USA
	14	NCU00166061	Mcintosh County, Georgia, USA
	15	CM222731	Nueva Gerona, Cuba
	16	CM314564	Pasco County, Florida, USA
	17	CM316967	Juruena river, Mato Grosso, Brasil
	18	CM327643	Tegucigalpa, Honduras
	19	CM359774	Provincia de Imbabura, Ecuador
	20	GY18-177	Texas, USA
Pennisetum alopecuroides	21	TUT09647	Mt.Jeokgeun, Cheorwon-gun, Gangwon-do, Republic of Korea
	22	TUT09692	Mt.Baekseok, Pyeongchang-gun, Gangwon-do, Republic of Korea
	23	TUT11547	Mt.Seodaesan, Geumsan-gun, Chungcheongnam-do, Republic of Korea
	24	TUT15223	Hwajinpo Goseong-gun, Gangwon-do, Republic of Korea
	25	TUT18558	Sangsin-ri, Banpo-myeon, Gongju-si, Chungcheongnam-do, Republic of Korea
	26	TUT26268	Mt. Eumdal Yeosu-si, Jeollanam-do, Republic of Korea
	27	TUT27078	Mt.Manin, Haso-dong, dong-gu, Daejeon-si, Republic of Korea
	28	KWU 01002	Mt. Dotdae, Gimhae-si Gyeongsangnam-do, Republic of Korea
	29	KHB1558049	Sinan-gun, Jeollanam-do, Republic of Korea
	30	KHB1145914	Mt. Mukbang, Gongju-si, Chungcheongnam-do, Republic of Korea
The bold letters indicate samples for NGS

## Sheet: Supplementary Table 5
Supplementary Table 5. Genes composition of the Cenchrus chloroplast genomes
Groups of genes	Names of genes
Ribosomal RNAs	rrn4.5(2x), rrn5(2x), rrn16(2x), rrn23(2x)
Transfer RNAs	trnA-UGC*(2x), trnC-GCA, trnD-GUC, trnE-UUC, trnF-GAA, trnG_UCC*, trnG-GCC, trnH-GUG, trnI-CAU(2x),trnI-GAU*(2x), trnK-UUU*, trnL-UAA*, trnL-UAG, trnL-CAA(2x), trnfM-CAU, trnM-CAU, trnN-GUU(2x), trnP-UGG, trnQ-UUG, trnR-UCU, trnR-ACG(2x),trnS-GCU, trnS-UGA, trnS-GGA, trnT-GGUΨ, trnT-UGU, trnV-UAC*, trnV-GAC(2x), trnW-CCA, trnY-GUA
Photosystem I	psaA, psaB, psaC, psaI, psaJ
Photosystem II	psbA, psbB, psbC, psbD, psbE, psbF, psbH, psbI, psbJ, psbK, psbL, psbM,psbN, psbT, psbZ
Cytochrome	petA, petB*, petD*, petG, petL, petN
ATP synthases	atpA, atpB, atpE, atpF*, atpH, atpI
Large unit of Rubisco	rbcL
NADH dehydrogenase	ndhA*, ndhB*(2x), ndhC, ndhD, ndhE, ndhF, ndhG, ndhH, ndhI, ndhJ, ndhK
ATP-dependent protease subunit P	clpP
Envelope membrane protein	cemA
Large units of ribosome	rpl2*(2x), rpl14, rpl16*, rpl20, rpl22, rpl23(2x), rpl32, rpl33, rpl36
Small units of ribosome	rps2, rps3, rps4, rps7(2x), rps8, rps11, rps12*(2x), rps14, rps15, rps16*, rps18, rps19
RNA polymerase	rpoA, rpoB, rpoC1,rpoC2
Initiation factor	infA
Miscellaneous protein	ccsA, matK
Hypothetical proteins and conserved reading frames	ycf68 (2x), ycf2(2x), ycf3*, ycf4, ycf15(2x)
*- genes with introns; 2x-duplicated genes; Ψ-pseudogenes.

## Sheet: Supplementary Table 6
Supplementary Table 6. The feature of forward repeats in the chloroplast genomes of Cenchrus longispinus and C. echinatus.
Type of repeat	Location	Sequence	Cenchrus longispinus	C. echinatus
			Length (bp)
Forward	rpoC2	GTAAAAATGAAATCCTAGAAGACAAATATAGGACTCTAGAGGA	43	43
Forward	IGS (ndhF-rpl32)	TAGTTATGTTATCTAGTTAT	20	13 (deletion)
Forward	IGS (ndhC-atpE)	AGTAAAGTAAACATAAGATATCCATC	26	26
Forward	IGS (psbZ-psbM)-rpl2 exon1	CAAATGTATGCATTTCGATTAG	22	22
Forward	IGS (rps4-ndhJ)	ACATATTCATTAATAATCTAG	21	21
Forward	IGS (psbI-psbD)-IGS (psbC-psbZ)	AGAGAGGGATTCGAACCCTC	20	20
Forward	IGS (petN-trnC-GCA)	ATTTTCTATCTTTCTATGAA	20	20
Forward	IGS (psbZ-psbM)	TACATATATTATGTACATTA	20	20
Forward	IGS (trnC-GCA-rpoB)- rpoB	GATAAAAAAGAAAGGATATG	20	20
Forward	IGS (rpoC1-rpoC2)	ATTGTCGAATCCTACTCAGC	20	20
Forward	IGS (ndhF-rpl32)	TTTTTATCTCCCCATCTTAT	20	20
Forward	trnQ-UUG-trnC-GCA	CTGCCTTACCACTTGGCCA	19	19
Forward	IGS (petN-trnC-GCA)	TATAGAGGTAGGAATTTGT	19	19
Forward	trnF-GAA-trnA-UGC	ATAGCTCAGTTGGTAGAGC	19	19
Forward	IGS (trnK-UUU-matK)	TTAGTTAATTAGTAAAT	18	18
Forward	IGS (psbK-psbI)- IGS (ndhC-trnV-UAC)	AAAATGAAAAAAAAAAAA	18	0 (deletion)
Forward	trnS-UGA- trnS-GCU	CCACTCAGCCATCTCTCC	18	18

## Sheet: Supplementary Table 7
Supplementary Table 7. The feature of SSRs in the chloroplast genomes of Cenchrus longispinus and C. echinatus.
Type of repeat	Sequence	Location	Cenchrus longispinus	C. echinatus
			Length (bp)
A Repeat	AAAAAAAAAAAAAAAA	IGS (psbK-psbI)	16	9
A Repeat	AAAAAAAAAAAAAAAA	IGS (matK-trnK-UUU)	16	15
A Repeat	AAAAAAAAAAAA	IGS (petD-rpoA)	12	11
A Repeat	AAAAAAAAAAAA	IGS (ndhC-trnV-UAC)	12	10
A Repeat	AAAAAAAAAAAA	IGS (psbM-petN)	12	11
A Repeat	AAAAAAAAAAAA	IGS (trnD-GUC-psbM)	12	11
A Repeat	AAAAAAAAAAAA	IGS (trnG-UCC intron)	12	12
A Repeat	AAAAAAAAAAAA	IGS (trnG-GCC-trnfM-CAU)	12	13
A Repeat	AAAAAAAAAAAA	IGS (rps16-trnG-UUC)	12	11
A Repeat	AAAAAAAAAAA	IGS (petB intron)	11	12
A Repeat	AAAAAAAAAAA	IGS (trnT-UGU-trnL-UAA)	11	13
A Repeat	AAAAAAAAAAA	IGS (atpF-atpA)	11	11
A Repeat	AAAAAAAAAAA	IGS (trnD-GUC-psbM)	11	10
A Repeat	AAAAAAAAAA	IGS (ycf3-trnS-GGA)	10	10
A Repeat	AAAAAAAAAA	IGS (ycf3 intron)	10	10
A Repeat	AAAAAAAAAA	IGS (rpl32-trnL-UAG)	10	9
A Repeat	AAAAAAAAAA	IGS (ndhF-rpl32)	10	13
A Repeat	AAAAAAAAAA	IGS (ndhG-ndhI)	10	10
A Repeat	TTTTTTTTTTTTTTTTT	IGS (psaA-ycf3)	17	16
A Repeat	TTTTTTTTTTTTTTT	IGS (atpB-rbcL)	15	16
A Repeat	TTTTTTTTTTTTTTT	ndhK	15	15
A Repeat	TTTTTTTTTTTT	IGS (rps16 intron)	12	11
A Repeat	TTTTTTTTTTTT	IGS (petD-rpoA)	12	10
A Repeat	TTTTTTTTTTTT	IGS (rpl33-rps18)	12	11
A Repeat	TTTTTTTTTTTT	IGS (ndhC-trnV-UAC)	12	11
A Repeat	TTTTTTTTTTTT	rps14	12	12
A Repeat	TTTTTTTTTTTT	IGS (atpF intron)	12	12
A Repeat	TTTTTTTTTTTT	IGS (atpI-atpH)	12	12
A Repeat	TTTTTTTTTTTT	IGS (atpI-atpH)	12	14
A Repeat	TTTTTTTTTTTT	IGS (rpoC2-rps2)	12	12
A Repeat	TTTTTTTTTTTT	IGS (rps16-trnQ-UUG)	12	12
A Repeat	TTTTTTTTTTT	IGS (rpl16 intron)	11	11
A Repeat	TTTTTTTTTTT	infA	11	11
A Repeat	TTTTTTTTTTT	IGS (rps11-rpl36)	11	10
A Repeat	TTTTTTTTTTT	IGS (trnC-GCA-rpoB)	11	10
A Repeat	TTTTTTTTTT	IGS (ccsA-ndhD)	10	10
A Repeat	TTTTTTTTTT	IGS (ndhF-trnR-UCU)	10	11
A Repeat	TTTTTTTTTT	IGS (rbcL-psaI)	10	10
A Repeat	TTTTTTTTTT	IGS (trnT-GGU-trnE-UUC)	10	12
A Repeat	TTTTTTTTTT	IGS (trnS-GCU-psbD)	10	10
C Repeat	GGGGGGGGGG	IGS (trnI-GAU intron)	10	10
C Repeat	GGGGGGGGGG	psbC	10	10
AT Repeat	TATATATATA	ycf15	10	10
AT Repeat	TATATATATA	IGS (trnP-UGG-psaJ)	10	12
AT Repeat	ATATATATAT	rpoC2	10	10
AG Repeat	TCTCTCTCTC	ndhH	10	10
AAG Repeat	TTCTTCTTCTTC	rpl22	12	12
AATC Repeat	ATTGATTGATTG	IGS (ndhF-rpl32)	12	12
ACAT Repeat	ATACATACATAC	IGS (trnD-GUC-psbM)	12	12
ACCT Repeat	GTAGGTAGGTAGGTAG	IGS (trnM-CAU-atpE)	16	16
AGGC Repeat	CTGCCTGCCTGC	IGS (trnG-GCC-trnfM-CAU)	12	12
AAAT Repeat	AATAAATAAATA	ndhD	12	12
AACG Repeat	TCGTTCGTTCGT	IGS (trnA-UGC-trnR-ACG)	12	12
ATCC Repeat	ATCCATCCATCCAT	ndhH	12	12
AAATC Repeat	TTGATTTGATTTGAT	IGS (ndhC-trnV-UAC)	15	10
AGCAT Repeat	CTATGCTATGCTATG	IGS (trnD-GUC-psbM)	15	15
The red numbers indicate the different lengths between Cenchrus longispinus and C. echinatus.
